# Supplementary material for: Increased Dentate Gyrus Excitability in the Intrahippocampal Kainic Acid Mouse Model for Temporal Lobe Epilepsy
Source: MDPI journal article supplement (doi:10.3390/ijms25010660), 2024-01-04
Supplement: s1 [file s1]

## Supplementary Materials

Table S1: overview of all animals and slices used in this study.

| Group          | Region   |                  |                      |        |                  |                      |
|----------------|----------|------------------|----------------------|--------|------------------|----------------------|
|                | CA1      |                  |                      | DG     |                  |                      |
|                | Animal   | Number of slices | Time after injection | Animal | Number of slices | Time after injection |
| <b>IHKA</b>    | 11020    | 3                | 4 weeks              | 20322  | 2                | 6 weeks              |
|                | 21020    | 1                | 4 weeks              | 30322  | 3                | 4 weeks              |
|                | 40322    | 1                | 4 weeks              | 40322  | 1                | 4 weeks              |
|                | 190321   | 3                | 5 weeks              | 70421  | 2                | 5 weeks              |
|                | 191120   | 4                | 5 weeks              | 80621  | 4                | 5 weeks              |
|                | 230321   | 2                | 4 weeks              | 90421  | 4                | 5 weeks              |
|                | 241120   | 3                | 5 weeks              | 100621 | 2                | 5 weeks              |
|                | 250321   | 4                | 4 weeks              | 160322 | 2                | 5 weeks              |
|                | 251120   | 3                | 5 weeks              | 200322 | 4                | 4 weeks              |
|                | 260321   | 2                | 4 weeks              | 210421 | 2                | 7 weeks              |
|                | 261120   | 1                | 6 weeks              | 220322 | 4                | 4 weeks              |
|                | 280920   | 1                | 4 weeks              | 230322 | 4                | 4 weeks              |
|                | 300920   | 1                | 4 weeks              | 240322 | 2                | 4 weeks              |
|                | 310820   | 1                | 7 weeks              | 280222 | 1                | 6 weeks              |
|                | 27082020 | 1                | 7 weeks              | 280421 | 5                | 4 weeks              |
|                |          |                  |                      | 290421 | 4                | 4 weeks              |
| <b>Control</b> | 10920    | 1                | 7 weeks              | 10621  | 4                | 4 weeks              |
|                | 20621    | 1                | 4 weeks              | 20621  | 1                | 4 weeks              |
|                | 30620    | 1                | 7 weeks              | 70621  | 4                | 5 weeks              |
|                | 40620    | 2                | 7 weeks              | 80421  | 4                | 5 weeks              |
|                | 171120   | 4                | 4 weeks              | 110621 | 2                | 5 weeks              |
|                | 180321   | 5                | 5 weeks              | 170322 | 4                | 4 weeks              |
|                | 181120   | 4                | 4 weeks              | 200421 | 4                | 7 weeks              |
|                | 240321   | 3                | 4 weeks              | 270421 | 6                | 4 weeks              |
|                | 300620   | 1                | 7 weeks              | 310322 | 4                | 4 weeks              |
|                | 120221   | 3                | /                    |        |                  |                      |
|                | 150221   | 1                | /                    |        |                  |                      |

**Table S2: 95 % confidence intervals for the ratio of fEPSP2 to fEPSP1 slope in the DG (p<0.001 for group effect, linear mixed model,).**

| Condition | Stimulation Intensity | 95% Confidence Interval |             |
|-----------|-----------------------|-------------------------|-------------|
|           | (mV)                  | Lower Bound             | Upper Bound |
| Control   | 500                   | 0.989                   | 1.327       |
|           | 750                   | 1.325                   | 1.608       |
|           | 1000                  | 1.351                   | 1.664       |
|           | 1250                  | 1.303                   | 1.547       |
|           | 1500                  | 1.267                   | 1.499       |
|           | 1750                  | 1.290                   | 1.517       |
|           | 2000                  | 1.232                   | 1.458       |
|           | 2250                  | 1.239                   | 1.463       |
|           | 2500                  | 1.223                   | 1.445       |
|           | 2750                  | 1.176                   | 1.399       |
|           | 3000                  | 1.187                   | 1.412       |
|           | 3250                  | 1.177                   | 1.401       |
|           | 3500                  | 1.177                   | 1.411       |
| IHKA      | 500                   | 0.817                   | 1.080       |
|           | 750                   | 0.896                   | 1.120       |
|           | 1000                  | 0.866                   | 1.122       |
|           | 1250                  | 0.875                   | 1.073       |
|           | 1500                  | 0.865                   | 1.052       |
|           | 1750                  | 0.871                   | 1.053       |
|           | 2000                  | 0.828                   | 1.009       |
|           | 2250                  | 0.840                   | 1.019       |
|           | 2500                  | 0.832                   | 1.009       |
|           | 2750                  | 0.826                   | 1.004       |
|           | 3000                  | 0.826                   | 1.006       |
|           | 3250                  | 0.828                   | 1.007       |
|           | 3500                  | 0.795                   | 0.983       |
